# Supplementary material for: Chemically modified graphene films for high-performance optical NO2 sensors
Source: Royal Society of Chemistry journal article supplement (doi:10.1039/c6an00552g), 2016-01-01
Supplement: c6an00552g1.pdf [file c6an00552g1.pdf]

## Supplementary Information

# Surface chemically modified graphene film for high performance optical NO<sub>2</sub> sensors

### 1. Supporting table

**Table S1.** XPS elemental analysis of S-h-rGO film.

| Name | % At Conc | % Mass Conc | Mass    |
|------|-----------|-------------|---------|
| C 1s | 90.70     | 87.41       | 12.011  |
| O 1s | 7.60      | 9.76        | 15.9994 |
| N 1s | 1.06      | 1.19        | 14.0067 |
| S 2p | 0.64      | 1.65        | 32.0648 |

### 2. Supporting figures

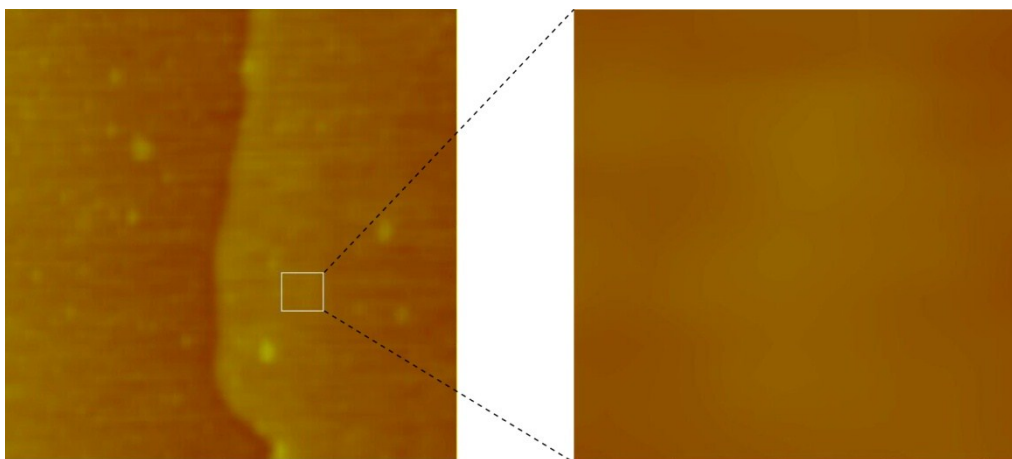

Figure S1. The surface roughness analysis of S-h-rGO film. The whole surface of S-h-rGO film is uniform, and its surface roughness is 2.69 nm.
